# Supplementary material for: Exonic Re-Sequencing of the Chromosome 2q24.3 Parkinson’s Disease Locus
Source: PubMed Central journal article supplement (PMC4474914; doi:10.1371/journal.pone.0128586), 2015-06-19
Supplement: pone.0128586.s001.pdf [file pone.0128586.s001.pdf]

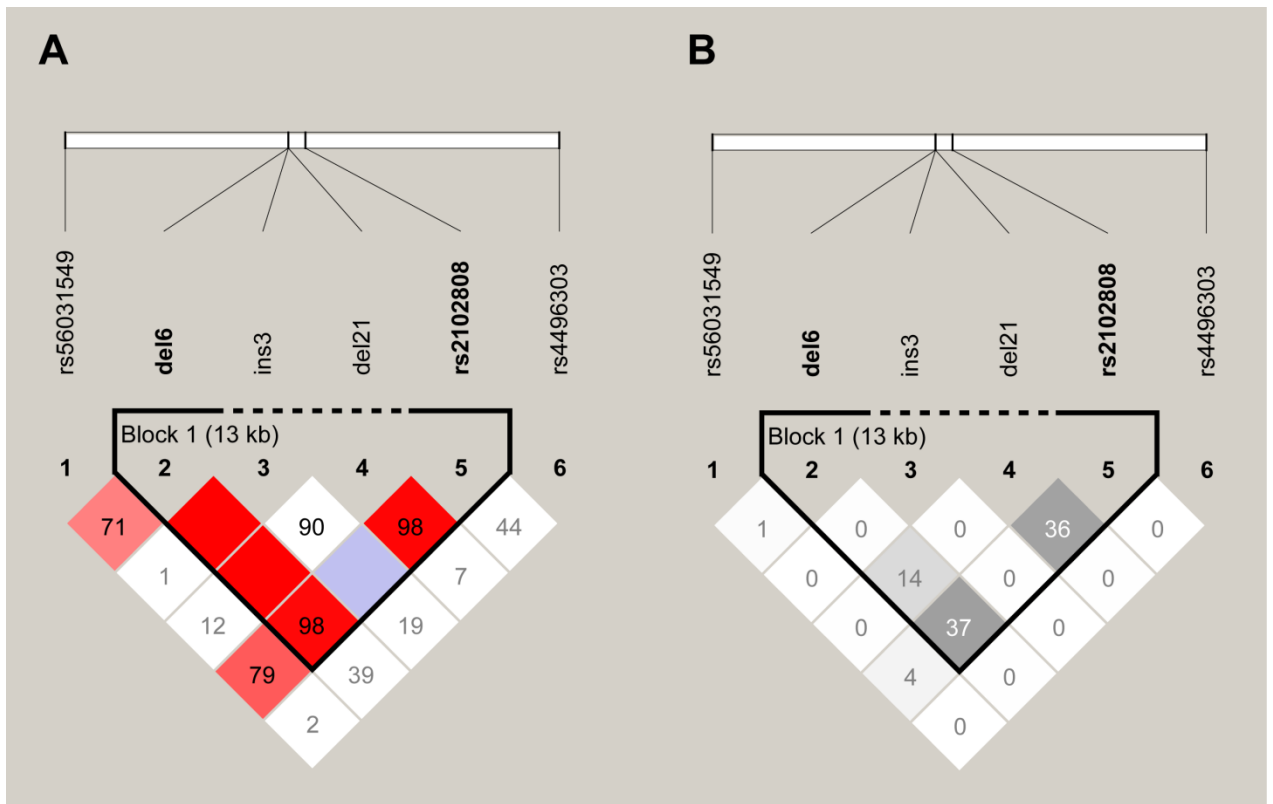

S1 Fig. Linkage disequilibrium (LD) between chromosome 2q24.3 variants

The left panel (A) shows the  $D'$  values and the right panel the  $r^2$  values. The LD was calculated in the US control samples and the figure was created using Haploview (Barrett JC, Fry B, Maller J, Daly MJ. Haploview: analysis and visualization of LD and haplotype maps. *Bioinformatics*. 2005 Jan 15). A. Numbers on the squares represent  $D'$  (x100) between two variants, no number mean  $D'=1$ . A white square represents LOD scores less than 2 and  $D'$  less than 1 (low LD), a light blue square represents  $D'=1$  but LOD score less than 2. Shades of pink squares represent  $D'$  less than 1 and LOD score more than 2 and bright red squares show variant in LD,  $D'=1$  and LOD score more than 2. B. Shades of grey squares represent the correlation between variants expressed as  $r^2$  (x100). Del6, del 21 and rs2102808 are in high LD but have very different minor allele frequencies, hence the high  $D'$  and low  $r^2$ .
